# Supplementary material for: Community mobilization to strengthen support for appropriate and timely use of antenatal and postnatal care: A review of reviews
Source: PubMed Central journal article supplement (PMC8710228; doi:10.7189/jogh.11.04076), 2021-12-30
Supplement: jogh-11-04076-s001.pdf [file jogh-11-04076-s001.pdf]

# Supplementary Material

## Table of Contents

|                                                                                                                         |    |
|-------------------------------------------------------------------------------------------------------------------------|----|
| <i>Appendix 1: Search strategy</i> .....                                                                                | 2  |
| <i>Appendix 2: JBI Critical Appraisal</i> .....                                                                         | 9  |
| <i>Appendix 3: Sustainable Development Goals (SDG) regions represented in reviews</i> .....                             | 11 |
| <i>Appendix 4: Key findings as reported by reviews</i> .....                                                            | 13 |
| <i>Appendix 5: Additional evidence reported in reviews to support Downe et al. qualitative evidence synthesis</i> ..... | 24 |

## Appendix 1: Search strategy

|   |                                                               |                                                                                                                                                                                                                                                                                          |
|---|---------------------------------------------------------------|------------------------------------------------------------------------------------------------------------------------------------------------------------------------------------------------------------------------------------------------------------------------------------------|
| 1 | ANC/PNC<br>TITLE                                              | (antenatal OR prenatal OR pregnan* OR matern* OR “child health” OR postnatal OR perinatal OR reproductive OR birth OR “family plan*” OR infant* OR mother* OR women OR woman OR ANC OR PNC)                                                                                              |
| 2 | Community<br>Mobilization<br>Strategies<br><br>TITLE/ABSTRACT | (communit* OR public OR stakeholder OR local* OR social OR patient* OR consumer*)<br><br>NEAR/2<br><br>(mobiliz* OR mobilis* OR engage* OR participat* OR sensiti* OR communicat* OR messag* OR dialog* OR outreach OR promot* OR media OR capacity OR educat* OR interven* OR behavio*) |
| 3 | Reviews<br>TITLE                                              | review OR systematic OR synthes*                                                                                                                                                                                                                                                         |
| 4 | Demand<br>TITLE                                               | utilis* OR utiliz* OR promot* OR uptake                                                                                                                                                                                                                                                  |

1 AND 2 AND 3

1 AND 3 AND 4

### CINAHL – 28 JAN – 374 RESULTS

- S1 TI antenatal OR prenatal OR pregnan\* OR matern\* OR “child health” OR postnatal OR perinatal OR reproductive OR birth OR “family plan\*” OR infant\* OR mother\* OR women OR woman OR ANC OR PNC
- S2 TI review OR systematic OR synthes\*
- S3 TI utilis\* OR utiliz\* OR promot\* OR uptake
- S4 TI (communit\* OR public OR stakeholder OR local\* OR social OR patient\* OR consumer\*)  
N2 (mobiliz\* OR mobilis\* OR engage\* OR participat\* OR sensiti\* OR communicat\* OR messag\* OR dialog\* OR outreach OR promot\* OR media OR capacity OR educat\* OR interven\* OR behavio\*)
- S5 AB (communit\* OR public OR stakeholder OR local\* OR social OR patient\* OR consumer\*)  
N2 (mobiliz\* OR mobilis\* OR engage\* OR participat\* OR sensiti\* OR communicat\* OR messag\* OR dialog\* OR outreach OR promot\* OR media OR capacity OR educat\* OR interven\* OR behavio\*)
- S6 S1 AND S2 AND S3
- S7 S4 OR S5
- S8 S1 AND S2 AND S7

S9 S6 OR S8

### **PUBMED – 28 JAN – 235 RESULTS**

("review"[Title] OR "systematic"[Title] OR "synthes\*"[Title]) AND ("antenatal"[Title] OR "prenatal"[Title] OR "pregnan\*"[Title] OR "matern\*"[Title] OR "child health"[Title] OR "postnatal"[Title] OR "perinatal"[Title] OR "reproductive"[Title] OR "birth"[Title] OR "family plan\*"[Title] OR "infant\*"[Title] OR "mother\*"[Title] OR "women"[Title] OR "woman"[Title] OR "ANC"[Title] OR "PNC"[Title]) AND (((("communit\*"[Title/Abstract] OR "public"[Title/Abstract] OR "stakeholder"[Title/Abstract] OR "local\*"[Title/Abstract] OR "social"[Title/Abstract] OR "patient\*"[Title/Abstract] OR "consumer\*"[Title/Abstract])) N2 ("mobiliz\*"[Title/Abstract] OR "mobilis\*"[Title/Abstract] OR "engage\*"[Title/Abstract] OR "participat\*"[Title/Abstract] OR "sensiti\*"[Title/Abstract] OR "communicat\*"[Title/Abstract] OR "messag\*"[Title/Abstract] OR "dialog\*"[Title/Abstract] OR "outreach"[Title/Abstract] OR "promot\*"[Title/Abstract] OR "media"[Title/Abstract] OR "capacity"[Title/Abstract] OR "educat\*"[Title/Abstract] OR "interven\*"[Title/Abstract] OR "behavio\*"[Title/Abstract]))) OR ((("review"[Title] OR "systematic"[Title] OR "synthes\*"[Title]) AND ("antenatal"[Title] OR "prenatal"[Title] OR "pregnan\*"[Title] OR "matern\*"[Title] OR "child health"[Title] OR "postnatal"[Title] OR "perinatal"[Title] OR "reproductive"[Title] OR "birth"[Title] OR "family plan\*"[Title] OR "infant\*"[Title] OR "mother\*"[Title] OR "women"[Title] OR "woman"[Title] OR "ANC"[Title] OR "PNC"[Title]) AND ("utilis\*"[Title] OR "utiliz\*"[Title] OR "promot\*"[Title] OR "uptake"[Title]))

### **PSYCINFO – 28 JAN – 341 RESULTS – WITH DEMAND WORDS**

(ti(review OR systematic OR synthes\*) AND ti((antenatal OR prenatal OR pregnan\* OR matern\* OR "child health" OR postnatal OR perinatal OR reproductive OR birth OR "family plan\*" OR infant\* OR mother\* OR women OR woman OR ANC OR PNC)) AND ti(utilis\* OR utiliz\* OR promot\* OR uptake)) OR (ti(review OR systematic OR synthes\*) AND ti((antenatal OR prenatal OR pregnan\* OR matern\* OR "child health" OR postnatal OR perinatal OR reproductive OR birth OR "family plan\*" OR infant\* OR mother\* OR women OR woman OR ANC OR PNC)) AND noft((communit\* OR public OR stakeholder OR local\* OR social OR patient\* OR consumer\*) NEAR/2 (mobiliz\* OR mobilis\* OR engage\* OR participat\* OR sensiti\* OR communicat\* OR messag\* OR dialog\* OR outreach OR promot\* OR media OR capacity OR educat\* OR interven\* OR behavio\*)))

### **EMBASE – 28 JAN – 662 RESULTS – WITH DEMAND WORDS**

Query((antenatal:ti OR prenatal:ti OR pregnan\*:ti OR matern\*:ti OR 'child health':ti OR postnatal:ti OR perinatal:ti OR reproductive:ti OR birth:ti OR 'family plan\*':ti OR infant\*:ti OR mother\*:ti OR women:ti OR woman:ti OR anc:ti OR pnc:ti) AND (review:ti OR systematic:ti OR synthes\*:ti) AND (utilis\*:ti OR utiliz\*:ti OR promot\*:ti OR uptake:ti) OR ((antenatal:ti OR prenatal:ti OR pregnan\*:ti OR matern\*:ti OR 'child health':ti OR postnatal:ti OR perinatal:ti OR reproductive:ti OR birth:ti OR 'family plan\*':ti OR infant\*:ti OR mother\*:ti OR women:ti OR woman:ti OR anc:ti OR pnc:ti) AND (review:ti OR systematic:ti OR synthes\*:ti) AND (((communit\* OR public OR stakeholder OR local\* OR social OR patient\* OR consumer\*) NEAR/2 (mobiliz\* OR mobilis\* OR engage\* OR participat\* OR sensiti\* OR communicat\* OR messag\* OR dialog\* OR outreach OR promot\* OR media OR capacity OR educat\* OR interven\* OR behavio\*)):ab,ti))) AND [2000-2021]/py

### **COCHRANE – 28 JAN – 32 RESULTS – WITH DEMAND WORDS**

Search Name:

Date Run: 28/01/2021 23:14:38

Comment:

ID Search Hits  
#1 (review OR systematic OR synthes\*):ti (Word variations have been searched) 10311  
#2 (utilis\* OR utiliz\* OR promot\* OR uptake):ti (Word variations have been searched)  
13491  
#3 ((communit\* OR public OR stakeholder OR local\* OR social OR patient\* OR  
consumer\*) NEAR/2 (mobiliz\* OR mobilis\* OR engage\* OR participat\* OR sensiti\* OR  
communicat\* OR messag\* OR dialog\* OR outreach OR promot\* OR media OR capacity OR  
educat\* OR interven\* OR behavio\*)):ti,ab,kw (Word variations have been searched) 75251  
#4 (antenatal OR prenatal OR pregnan\* OR matern\* OR "child health" OR postnatal OR  
perinatal OR reproductive OR birth OR "family plan\*" OR infant\* OR mother\* OR women OR  
woman OR ANC OR PNC):ti91867  
#5 #1 AND #2 AND #4 9  
#6 #1 AND #3 AND #4 26  
#7 #5 OR #6 34

**PROSPERO – 28 JAN – 133 RESULTS – WITH DEMAND WORDS**

#1 (antenatal OR prenatal OR pregnan\* OR matern\* OR child health OR postnatal OR  
perinatal OR reproductive OR birth OR family plan\* OR infant\* OR mother\* OR women OR  
woman OR ANC OR PNC):TI 6550  
#2 (review OR systematic OR synthes\*):TI 76685  
#3 (utilis\* OR utiliz\* OR promot\* OR uptake):TI 1230  
#4 ((communit\* OR public OR stakeholder OR local\* OR social OR patient\* OR  
consumer\*) NEAR2 (mobiliz\* OR mobilis\* OR engage\* OR participat\* OR sensiti\* OR  
communicat\* OR messag\* OR dialog\* OR outreach OR promot\* OR media OR capacity OR  
educat\* OR interven\* OR behavio\*)):TI 579  
#5 #2 AND #3 AND #1 123  
#6 #1 AND #2 AND #4 12  
#7 #5 OR #6 133

## MASCOT – 28 JAN – 20 RESULTS – WITH DEMAND WORDS

| Study               | Title                                                                                                                                                                             | View details           |
|---------------------|-----------------------------------------------------------------------------------------------------------------------------------------------------------------------------------|------------------------|
| Author (0)          | Pain and women's satisfaction with the experience of childbirth: a systematic review                                                                                              | <a href="#">Select</a> |
| Bhutta (2005)       | Community-based interventions for improving perinatal and neonatal health outcomes in developing countries: a review of the evidence.                                             | <a href="#">Select</a> |
| Bigirwa (2009)      | Effectiveness of community health workers (CHWs) in the provision of basic preventive and curative maternal, newborn and child health (MNCH) interventions: A systematic review.  | <a href="#">Select</a> |
| Brusse (2010)       | Electroencephalography during normotensive and hypertensive pregnancy: A systematic review                                                                                        | <a href="#">Select</a> |
| Car (2012)          | Integrating prevention of mother-to-child HIV transmission programs to improve uptake: A systematic review                                                                        | <a href="#">Select</a> |
| de Oliveira (2001)  | Extending breastfeeding duration through primary care: a systematic review of prenatal and postnatal interventions.                                                               | <a href="#">Select</a> |
| Kennedy (2010)      | Linking sexual and reproductive health and HIV interventions: a systematic review                                                                                                 | <a href="#">Select</a> |
| Mantel (2002)       | Can a developed country's maternal mortality review be used as the 'gold standard' for a developing country?                                                                      | <a href="#">Select</a> |
| Marston (2013)      | Effects of Community Participation on Improving Uptake of Skilled Care for Maternal and Newborn Health: A Systematic Review.                                                      | <a href="#">Select</a> |
| McMahan (2001)      | India: Community Partnerships for Safe Motherhood (CPSM). Empowered women and families: promoting better health behaviors. Results review.                                        | <a href="#">Select</a> |
| Murray (2012)       | Demand-side financing measures to increase maternal health service utilisation and improve health outcomes: a systematic review of evidence from low- and middle-income countries | <a href="#">Select</a> |
| Nyamtema (2011)     | Maternal health interventions in resource limited countries: a systematic review of packages, impacts and factors for change                                                      | <a href="#">Select</a> |
| Pai (2007)          | Rapid point-of-care HIV testing in pregnant women: a systematic review and meta-analysis                                                                                          | <a href="#">Select</a> |
| Pell (2011)         | Social and cultural factors affecting uptake of interventions for malaria in pregnancy in Africa: a systematic review of the qualitative research.                                | <a href="#">Select</a> |
| Prost (2013)        | Women's groups practising participatory learning and action to improve maternal and newborn health in low-resource settings: a systematic review and meta-analysis                | <a href="#">Select</a> |
| Rojahn (2011)       | Community-Based Intervention Packages for Reducing Maternal and Neonatal Morbidity and Mortality and Improving Neonatal Outcomes: A Review Synopsis.                              | <a href="#">Select</a> |
| Say (2007)          | A systematic review of inequalities in the use of maternal health care in developing countries: Examining the scale of the problem and the importance of context.                 | <a href="#">Select</a> |
| Thangaratnam (2012) | Interventions to reduce or prevent obesity in pregnant women: A systematic review                                                                                                 | <a href="#">Select</a> |
| Vieira (2012)       | Increasing the Use of Skilled Health Personnel Where Traditional Birth Attendants Were Providers of Childbirth Care: A Systematic Review                                          | <a href="#">Select</a> |
| Worrall (2007)      | The economics of malaria in pregnancy--a review of the evidence and research priorities.                                                                                          | <a href="#">Select</a> |

(Landscape mode works best if you are printing wide search results or report tables.)

***TOTAL IN COVIDENCE (without MASCOT)  
AFTER DUPLICATES = 1150***

## 2 SEPTEMBER 2021: searching for publications from Jan 2021

### CINAHL – 2 SEP – 4 RESULTS

- S3 (TI (communit\* OR public OR stakeholder OR local\* OR social OR patient\* OR consumer\*) N2 (mobiliz\* OR mobilis\* OR engage\* OR participat\* OR sensiti\* OR communicat\* OR messag\* OR dialog\* OR outreach OR promot\* OR media OR capacity OR educat\* OR interven\* OR behavio\*) OR AB (communit\* OR public OR stakeholder OR local\* OR social OR patient\* OR consumer\*) N2 (mobiliz\* OR mobilis\* OR engage\* OR participat\* OR sensiti\* OR communicat\* OR messag\* OR dialog\* OR outreach OR promot\* OR media OR capac [...](#)) [View Results](#) (4) [View Details](#) [Edit](#)
- S2 TI ( (communit\* OR public OR stakeholder OR local\* OR social OR patient\* OR consumer\*) N2 (mobiliz\* OR mobilis\* OR engage\* OR participat\* OR sensiti\* OR communicat\* OR messag\* OR dialog\* OR outreach OR promot\* OR media OR capacity OR educat\* OR interven\* OR behavio\*) ) OR AB ( (communit\* OR public OR stakeholder OR local\* OR social OR patient\* OR consumer\*) N2 (mobiliz\* OR mobilis\* OR engage\* OR participat\* OR sensiti\* OR communicat\* OR messag\* OR dialog\* OR outreach OR promot\* OR media OR [...](#)) [View Results](#) (194,695) [View Details](#) [Edit](#)
- S1 TI ( antenatal OR prenatal OR pregnan\* OR matern\* OR "child health" OR postnatal OR perinatal OR reproductive OR birth OR "family plan\*" OR infant\* OR mother\* OR women OR woman OR ANC OR PNC ) AND TI ( review OR systematic OR synthes\* ) AND TI ( utilis\* OR utiliz\* OR promot\* OR uptake ) [View Results](#) (152) [View Details](#) [Edit](#)

### PUBMED – 2 SEP – 38 RESULTS

("review"[Title] OR "systematic"[Title] OR "synthes\*"[Title]) AND ("antenatal"[Title] OR "prenatal"[Title] OR "pregnan\*"[Title] OR "matern\*"[Title] OR "child health"[Title] OR "postnatal"[Title] OR "perinatal"[Title] OR "reproductive"[Title] OR "birth"[Title] OR "family plan\*"[Title] OR "infant\*"[Title] OR "mother\*"[Title] OR "women"[Title] OR "woman"[Title] OR "ANC"[Title] OR "PNC"[Title]) AND (((("communit\*"[Title/Abstract] OR "public"[Title/Abstract] OR "stakeholder"[Title/Abstract] OR "local\*"[Title/Abstract] OR "social"[Title/Abstract] OR "patient\*"[Title/Abstract] OR "consumer\*"[Title/Abstract]) N2 ("mobiliz\*"[Title/Abstract] OR "mobilis\*"[Title/Abstract] OR "engage\*"[Title/Abstract] OR "participat\*"[Title/Abstract] OR "sensiti\*"[Title/Abstract] OR "communicat\*"[Title/Abstract] OR "messag\*"[Title/Abstract] OR "dialog\*"[Title/Abstract] OR "outreach"[Title/Abstract] OR "promot\*"[Title/Abstract] OR "media"[Title/Abstract] OR "capacity"[Title/Abstract] OR "educat\*"[Title/Abstract] OR "interven\*"[Title/Abstract] OR "behavio\*"[Title/Abstract]))) OR ((("review"[Title] OR "systematic"[Title] OR "synthes\*"[Title]) AND ("antenatal"[Title] OR "prenatal"[Title] OR "pregnan\*"[Title] OR "matern\*"[Title] OR "child health"[Title] OR "postnatal"[Title] OR "perinatal"[Title] OR "reproductive"[Title] OR "birth"[Title] OR "family plan\*"[Title] OR "infant\*"[Title] OR "mother\*"[Title] OR "women"[Title] OR "woman"[Title]

OR "ANC"[Title] OR "PNC"[Title]) AND ("utilis\*"[Title] OR "utiliz\*"[Title] OR "promot\*"[Title] OR "uptake"[Title]))

## PSYCHINFO – 2 SEP – 18 RESULTS

(ti(review OR systematic OR synthes\*) AND ti((antenatal OR prenatal OR pregnan\* OR matern\* OR "child health" OR postnatal OR perinatal OR reproductive OR birth OR "family plan\*" OR infant\* OR mother\* OR women OR woman OR ANC OR PNC)) AND ti(utilis\* OR utiliz\* OR promot\* OR uptake)) OR (ti(review OR systematic OR synthes\*) AND ti((antenatal OR prenatal OR pregnan\* OR matern\* OR "child health" OR postnatal OR perinatal OR reproductive OR birth OR "family plan\*" OR infant\* OR mother\* OR women OR woman OR ANC OR PNC)) AND noft((communit\* OR public OR stakeholder OR local\* OR social OR patient\* OR consumer\*) NEAR/2 (mobiliz\* OR mobilis\* OR engage\* OR participat\* OR sensiti\* OR communicat\* OR messag\* OR dialog\* OR outreach OR promot\* OR media OR capacity OR educat\* OR interven\* OR behavio\*)))

## EMBASE – 2 SEP – 89 RESULTS

#1 AND 2021:py

[89](#)

#1 (antenatal:ti OR prenatal:ti OR pregnan\*:ti OR matern\*:ti OR 'child health':ti OR postnatal:ti OR perinatal:ti OR reproductive:ti OR birth:ti OR 'family plan\*':ti OR infant\*:ti OR mother\*:ti OR women:ti OR woman:ti OR anc:ti OR pnc:ti) AND (review:ti OR systematic:ti OR synthes\*:ti) AND (utilis\*:ti OR utiliz\*:ti OR promot\*:ti OR uptake:ti) OR ((antenatal:ti OR prenatal:ti OR pregnan\*:ti OR matern\*:ti OR 'child health':ti OR postnatal:ti OR perinatal:ti OR reproductive:ti OR birth:ti OR 'family plan\*':ti OR infant\*:ti OR mother\*:ti OR women:ti OR woman:ti OR anc:ti OR pnc:ti) AND (review:ti OR systematic:ti OR synthes\*:ti) AND (((communit\* OR public OR stakeholder OR local\* OR social OR patient\* OR consumer\*) NEAR/2 (mobiliz\* OR mobilis\* OR engage\* OR participat\* OR sensiti\* OR communicat\* OR messag\* OR dialog\* OR outreach OR promot\* OR media OR capacity OR educat\* OR interven\* OR behavio\*)):ab,ti))

[772](#)

## COCHRANE – 2 SEP – 0 RESULTS

ID Search Hits

#1 (review OR systematic OR synthes\*):ti (Word variations have been searched) 10505

#2 (utilis\* OR utiliz\* OR promot\* OR uptake):ti (Word variations have been searched) 14371

#3 ((communit\* OR public OR stakeholder OR local\* OR social OR patient\* OR consumer\*) NEAR/2 (mobiliz\* OR mobilis\* OR engage\* OR participat\* OR sensiti\* OR communicat\* OR messag\* OR dialog\* OR outreach OR promot\* OR media OR capacity OR educat\* OR interven\* OR behavio\*)):ti,ab,kw (Word variations have been searched) 79459

#4 (antenatal OR prenatal OR pregnan\* OR matern\* OR "child health" OR postnatal OR perinatal OR reproductive OR birth OR "family plan\*" OR infant\* OR mother\* OR women OR woman OR ANC OR PNC):ti 96300

#5 #1 AND #2 AND #4 9

#6 #1 AND #3 AND #4 25

#7 #5 OR #6 0

(with Cochrane Library publication date from Jan 2021 to present)

## PROSPERO – 2 SEP – 29 RESULTS

#1 (antenatal OR prenatal OR pregnan\* OR matern\* OR child health OR postnatal OR perinatal OR reproductive OR birth OR family plan\* OR infant\* OR mother\* OR women OR woman OR ANC OR PNC):TI 7907

#2 (review OR systematic OR synthes\*):TI 95012

#3 (utilis\* OR utiliz\* OR promot\* OR uptake):TI 1441

#4 ((communit\* OR public OR stakeholder OR local\* OR social OR patient\* OR consumer\*) NEAR2 (mobiliz\* OR mobilis\* OR engage\* OR participat\* OR sensiti\* OR communicat\* OR messag\* OR dialog\* OR outreach OR promot\* OR media OR capacity OR educat\* OR interven\* OR behavio\*)):TI 697

#5 #2 AND #3 AND #1 147

#6 #1 AND #2 AND #4 13

#7 #5 OR #6 158  
with date filter: 29

***TOTAL = 178***

***IN COVIDENCE AFTER DUPLICATES = 124***



## Appendix 2: JBI Critical Appraisal

| <i>Author, Year</i>                     | <i>Is review question clearly and explicitly stated?</i> | <i>Were inclusion criteria appropriate for review question?</i> | <i>Was search strategy appropriate?</i> | <i>Were sources and resources used to search for studies adequate?</i> | <i>Were criteria for appraising studies appropriate?</i> | <i>Was critical appraisal conducted by two or more reviewers independently?</i> | <i>Were there methods to minimize errors in data extraction?</i> | <i>Were methods used to combine studies appropriate?</i> | <i>Was likelihood of publication bias assessed?</i> | <i>Were recommendations for policy and/or practice supported by reported data?</i> | <i>Were specific directives for new research appropriate?</i> |
|-----------------------------------------|----------------------------------------------------------|-----------------------------------------------------------------|-----------------------------------------|------------------------------------------------------------------------|----------------------------------------------------------|---------------------------------------------------------------------------------|------------------------------------------------------------------|----------------------------------------------------------|-----------------------------------------------------|------------------------------------------------------------------------------------|---------------------------------------------------------------|
| <i>George et al</i>                     | Yes                                                      | Yes                                                             | Yes                                     | Yes                                                                    | Yes                                                      | Yes                                                                             | Yes                                                              | Yes                                                      | Yes                                                 | Yes                                                                                | Yes                                                           |
| <i>Kearns et al</i>                     | No                                                       | Unclear                                                         | Yes                                     | Yes                                                                    | No                                                       | No                                                                              | No                                                               | Unclear                                                  | No                                                  | Yes                                                                                | Yes                                                           |
| <i>Kuhlmann et al</i>                   | Yes                                                      | Yes                                                             | No                                      | Yes                                                                    | No                                                       | No                                                                              | No                                                               | Yes                                                      | Yes                                                 | Yes                                                                                | Yes                                                           |
| <i>Lassi et al</i>                      | Yes                                                      | Yes                                                             | Yes                                     | Yes                                                                    | Yes                                                      | Yes                                                                             | Yes                                                              | Yes                                                      | Yes                                                 | Yes                                                                                | Yes                                                           |
| <i>Mangham-Jeffries et al</i>           | Unclear                                                  | Yes                                                             | Yes                                     | Yes                                                                    | Yes                                                      | Unclear                                                                         | Yes                                                              | Yes                                                      | Yes                                                 | Yes                                                                                | Yes                                                           |
| <i>Marston et al</i>                    | Yes                                                      | Yes                                                             | Yes                                     | Yes                                                                    | Unclear                                                  | Unclear                                                                         | Unclear                                                          | Yes                                                      | Yes                                                 | Yes                                                                                | Yes                                                           |
| <i>Mbuagbaw et al</i>                   | Yes                                                      | Yes                                                             | Yes                                     | Yes                                                                    | Yes                                                      | Yes                                                                             | Yes                                                              | Yes                                                      | Yes                                                 | Unclear                                                                            | Yes                                                           |
| <i>Perry et al &amp; Jennings et al</i> | Yes                                                      | Yes                                                             | Yes                                     | Yes                                                                    | Unclear                                                  | Unclear                                                                         | Yes                                                              | Yes                                                      | Yes                                                 | Yes                                                                                | Yes                                                           |
| <i>Prost et al</i>                      | Yes                                                      | Yes                                                             | Yes                                     | Yes                                                                    | Yes                                                      | Unclear                                                                         | Yes                                                              | Yes                                                      | Yes                                                 | Yes                                                                                | Unclear                                                       |
| <i>Sarkar et al</i>                     | Yes                                                      | Yes                                                             | Yes                                     | Yes                                                                    | Yes                                                      | Unclear                                                                         | Yes                                                              | Yes                                                      | Unclear                                             | Yes                                                                                | Unclear                                                       |
| <i>Sharma et al</i>                     | Yes                                                      | Yes                                                             | Yes                                     | Yes                                                                    | Yes                                                      | Yes                                                                             | Yes                                                              | Yes                                                      | Yes                                                 | Yes                                                                                | Yes                                                           |
| <i>Wekesah et al</i>                    | Yes                                                      | Yes                                                             | Yes                                     | Yes                                                                    | Unclear                                                  | Unclear                                                                         | No                                                               | Yes                                                      | Yes                                                 | Yes                                                                                | No                                                            |
| <i>Beck et al</i>                       | Yes                                                      | Yes                                                             | Unclear                                 | Unclear                                                                | Unclear                                                  | Unclear                                                                         | Unclear                                                          | Yes                                                      | Yes                                                 | Yes                                                                                | Yes                                                           |
| <i>Deshmukh et al</i>                   | No                                                       | No                                                              | Unclear                                 | Unclear                                                                | Yes                                                      | Yes                                                                             | Unclear                                                          | Yes                                                      | Yes                                                 | Yes                                                                                | No                                                            |
| <i>George &amp; Branchini</i>           | Yes                                                      | Yes                                                             | Unclear                                 | Unclear                                                                | Yes                                                      | No                                                                              | Yes                                                              | Yes                                                      | Yes                                                 | Yes                                                                                | Yes                                                           |



### Appendix 3: Sustainable Development Goals (SDG) regions represented in reviews

| <i>STUDY</i>                            | <i>COUNTRIES</i>                                                                                                                                                                                                                                                                              | <i>SDG REGIONS</i> |                           |                          |                                 |                                |                                  |         |
|-----------------------------------------|-----------------------------------------------------------------------------------------------------------------------------------------------------------------------------------------------------------------------------------------------------------------------------------------------|--------------------|---------------------------|--------------------------|---------------------------------|--------------------------------|----------------------------------|---------|
| <i>George et al</i>                     | India, Uganda                                                                                                                                                                                                                                                                                 | Sub-Saharan Africa | Central and Southern Asia |                          |                                 |                                |                                  |         |
| <i>Kearns et al</i>                     | Ethiopia, Nepal, Pakistan, Tanzania, Bangladesh, Kenya, USA, Australia, Netherlands, Malawi, Tanzania                                                                                                                                                                                         | Sub-Saharan Africa | Central and Southern Asia | Europe and North America |                                 |                                |                                  | Oceania |
| <i>Lassi et al</i>                      | India, Pakistan, Bangladesh, Nepal, China, Vietnam, Syria, Malawi, Tanzania, Uganda, Ethiopia, Egypt, Kenya, South Africa, Zambia, Guatemala, Argentina                                                                                                                                       | Sub-Saharan Africa | Central and Southern Asia |                          | Latin America and the Caribbean | Eastern and South-Eastern Asia |                                  |         |
| <i>Mangham-Jeffries et al</i>           | LMICs (Bangladesh, Benin, Guinea, Burkina Faso, Cambodia, DRC, The Gambia, Honduras, India, Indonesia, Kenya, Malawi, Mozambique, Nepal, Niger, Nigeria, Papa New Guinea, Senegal, Uganda, Ukraine, Zambia)                                                                                   | Sub-Saharan Africa | Central and Southern Asia | Europe and North America | Latin America and the Caribbean | Eastern and South-Eastern Asia |                                  |         |
| <i>Marston et al</i>                    | Bangladesh, Kenya, Malawi, Nepal, India                                                                                                                                                                                                                                                       | Sub-Saharan Africa | Central and Southern Asia |                          |                                 |                                |                                  |         |
| <i>Mbuagbaw et al</i>                   | Argentina (2), Bangladesh (4), Brazil, Cuba (2), Eastern China, Ghana, Honduras, India (3), Laos, Malawi, Mexico (3), Mongolia, Nepal (2), Pakistan (3), Rwanda, Saudi Arabia, South Africa (2), Southern Tanzania, Thailand, Uganda, United Kingdom, USA (3), Vietnam, Zanzibar and Zimbabwe | Sub-Saharan Africa | Central and Southern Asia | Europe and North America | Latin America and the Caribbean | Eastern and South-Eastern Asia | Northern Africa and Western Asia |         |
| <i>Perry et al &amp; Jennings et al</i> | Global LMICs                                                                                                                                                                                                                                                                                  | Sub-Saharan Africa | Central and Southern Asia | Europe and North America | Latin America and the Caribbean | Eastern and South-Eastern Asia | Northern Africa and Western Asia |         |
| <i>Prost et al</i>                      | Bangladesh, India, Malawi, Nepal                                                                                                                                                                                                                                                              | Sub-Saharan Africa | Central and Southern Asia |                          |                                 |                                |                                  |         |
| <i>Sarkar et al</i>                     | India, Nepal, Malawi                                                                                                                                                                                                                                                                          | Sub-Saharan Africa | Central and Southern Asia |                          |                                 |                                |                                  |         |
| <i>Kuhlmann et al</i>                   | India, Burma, Pakistan, Tanzania, Argentina, DRC, Guatemala, Zambia, Cambodia, Bangladesh, Brazil, El Salvador, Peru, Honduras, Bolivia, Senegal, Ghana, Cameroon, Australia, Scotland, England                                                                                               | Sub-Saharan Africa | Central and Southern Asia | Europe and North America | Latin America and the Caribbean | Eastern and South-Eastern Asia |                                  | Oceania |

|                               |                                                                                                                                                                                                                                                                 |                    |                           |                          |                                 |                                |                                  |          |
|-------------------------------|-----------------------------------------------------------------------------------------------------------------------------------------------------------------------------------------------------------------------------------------------------------------|--------------------|---------------------------|--------------------------|---------------------------------|--------------------------------|----------------------------------|----------|
| <i>Sharma et al</i>           | South Asia (Bangladesh, India, Nepal, Pakistan)                                                                                                                                                                                                                 |                    | Central and Southern Asia |                          |                                 |                                |                                  |          |
| <i>Wekesah et al</i>          | Sub-Saharan Africa                                                                                                                                                                                                                                              | Sub-Saharan Africa |                           |                          |                                 |                                |                                  |          |
| <i>Beck et al</i>             | Sub-Saharan Africa (Kenya, Cameroon, Guinea Bissau, Madagascar, Liberia, Uganda, Nigeria, Malawi)                                                                                                                                                               | Sub-Saharan Africa |                           |                          |                                 |                                |                                  |          |
| <i>Deshmukh et al</i>         | Tanzania, Cameroon, Ethiopia, Malawi, Zambia, Morocco, Uganda, Ghana, Sudan, India, Nepal, Bangladesh, Pakistan, Indonesia, Philippines, China, Afghanistan, Jordan, Palestine                                                                                  | Sub-Saharan Africa | Central and Southern Asia |                          |                                 | Eastern and South-Eastern Asia | Northern Africa and Western Asia |          |
| <i>George &amp; Branchini</i> | India, Uganda, Angola, Ethiopia, Ghana, Kenya, Liberia, Mozambique, Tanzania, Bangladesh, Bolivia, DRC, Peru, Mexico, Cambodia, Canada, China, Honduras, Ghana, Nepal, Romania, Uruguay, China, Ghana, Pakistan, Kazakhstan, Argentina, Guatemala, South Africa | Sub-Saharan Africa | Central and Southern Asia | Europe and North America | Latin America and the Caribbean | Eastern and South-Eastern Asia |                                  |          |
| <i>Gogia et al</i>            | Pakistan, Bangladesh, India, Greece, Nepal, The Gambia                                                                                                                                                                                                          | Sub-Saharan Africa | Central and Southern Asia | Europe and North America |                                 |                                |                                  |          |
| <i>Muzyamba et al</i>         | Sub-Saharan Africa (Tanzania, Malawi, Kenya, Ethiopia, Angola, Sahel, Nigeria, Sudan, South Africa, Zambia)                                                                                                                                                     | Sub-Saharan Africa |                           |                          |                                 |                                |                                  |          |
| <i>Parsekar et al</i>         | South Asia (Bangladesh, India, Nepal)                                                                                                                                                                                                                           |                    | Central and Southern Asia |                          |                                 |                                |                                  |          |
| <i>Schiffman et al</i>        | India, Bangladesh, Pakistan, Nepal, Argentina, DRC, Guatemala, Zambia                                                                                                                                                                                           | Sub-Saharan Africa | Central and Southern Asia |                          | Latin America and the Caribbean |                                |                                  |          |
| <i>Singh et al</i>            | India                                                                                                                                                                                                                                                           |                    | Central and Southern Asia |                          |                                 |                                |                                  |          |
| <i>Takah et al</i>            | Sub-Saharan Africa (Mozambique, Tanzania, Uganda, Malawi, Zambia, Kenya)                                                                                                                                                                                        | Sub-Saharan Africa |                           |                          |                                 |                                |                                  |          |
| <i>Yuan et al</i>             | LMICs - Brazil, India, Guinea-Bissau, Bangladesh, Nepal, South Africa, Indonesia, Nigeria, Uganda, Philippines, Tanzania, Zambia, China, Colombia                                                                                                               | Sub-Saharan Africa | Central and Southern Asia |                          | Latin America and the Caribbean | Eastern and South-Eastern Asia |                                  |          |
|                               | <b>COUNT:</b>                                                                                                                                                                                                                                                   | <b>19</b>          | <b>18</b>                 | <b>7</b>                 | <b>8</b>                        | <b>8</b>                       | <b>3</b>                         | <b>2</b> |

## Appendix 4: Key findings as reported by reviews

| Author              | Geographic Setting                                                                                                      | # of Studies in Review | Outcome of Interest | # of Studies with CM + ANC/ PNC | Stated Objective/ Question                                                                                                                                                                                                             | CM Activities [as reported in review]                                                                                          | Key Findings/Major Themes                                                                                                                                                                                                                                                                                                                                                                                                                                                                                                                                                                       |
|---------------------|-------------------------------------------------------------------------------------------------------------------------|------------------------|---------------------|---------------------------------|----------------------------------------------------------------------------------------------------------------------------------------------------------------------------------------------------------------------------------------|--------------------------------------------------------------------------------------------------------------------------------|-------------------------------------------------------------------------------------------------------------------------------------------------------------------------------------------------------------------------------------------------------------------------------------------------------------------------------------------------------------------------------------------------------------------------------------------------------------------------------------------------------------------------------------------------------------------------------------------------|
| George et al 2015   | LMICs (India, Uganda)                                                                                                   | 4                      | ANC & early ANC     | 4 (1 early ANC)                 | What interventions to promote awareness of human rights/sexual and reproductive rights /right to access to quality care are effective in increasing demand for and use of health care to improve maternal and newborn health outcomes? | public meetings, events with community and staff, household visits, women's groups, awareness campaigns, local leader meetings | <p>Four studies demonstrated increase in ANC use, though one was not statistically significant.</p> <p>Antenatal examinations increased 30%, <math>p&lt;0.001</math> (Pandey), registration for ANC within 3 months of pregnancy increased from 31.4% to 54.3% and 17% to 41.8% (Ganju) and 95.8% received 1 ANC visit (vs 90.3%), <math>p&lt;0.001</math> and 72.5% received 3+ ANC visits (vs 61.0%), <math>p&lt;0.001</math> (Sinha).</p> <p>Average number of ANC visits provided at a facility per month were 5.5, but this was not a statistically significant difference (Bjorkman).</p> |
| Kearns et al 2016   | Global (Australia, Bangladesh, Ethiopia, Kenya, Malawi, Nepal, Netherlands, Pakistan, Tanzania, USA)                    | 8                      | ANC & PNC           | 3                               | This study focused on identifying and analysing innovative approaches aimed at improving ANC and PNC and drawing potentially generalisable lessons from them.                                                                          | women's groups, lady healthworkers, committees with local leaders                                                              | Women's groups can improve accessibility and acceptability of ANC and PNC by building consensus, creating a support network, and providing relevant health and pregnancy related information.                                                                                                                                                                                                                                                                                                                                                                                                   |
| Kuhlmann et al 2016 | Global (Argentina, Australia, Bangladesh, Bolivia, Brazil, Burma, Cambodia, Cameroon, DRC, El Salvador, England, Ghana, | 32                     | ANC                 | 16 (1 early ANC)                | To identify and assess the mechanisms of effect and the quality of evidence for the effectiveness of a spectrum of interventions along the three stages of CM across five sets of SRMH outcomes: maternal health and obstetric care,   | home visits for education; peer-facilitated and community/staff led participatory learning groups                              | <p>One study in Pakistan reported more pregnant women received ANC post-intervention (from 65.9% to 79.2%) while another reported that 90.8% of pregnant women received ANC by a trained TBA in the intervention communities.</p> <p>An additional study in Burma reported significant increases in at least one ANC visit (from 39.3% to 71.8%, <math>PRR=1.83</math>, 95% CI: 1.64-2.04) as well as in 4+ ANC visits (from 6.7% to 34.4%, <math>PRR= 2.06</math>, 95% CI: 1.72-2.47).</p>                                                                                                     |

| Author           | Geographic Setting                                                               | # of Studies in Review | Outcome of Interest | # of Studies with CM + ANC/ PNC | Stated Objective/ Question                                                                                         | CM Activities [as reported in review]                     | Key Findings/Major Themes                                                                                                                                                                                                                                                                                                                                                                                                                                                                                                                                                                                                                                                                                                                                                                                                                                                                                                                                                                                                                                                                                                                                                                                                                                                                                                                                                                                                                                                 |
|------------------|----------------------------------------------------------------------------------|------------------------|---------------------|---------------------------------|--------------------------------------------------------------------------------------------------------------------|-----------------------------------------------------------|---------------------------------------------------------------------------------------------------------------------------------------------------------------------------------------------------------------------------------------------------------------------------------------------------------------------------------------------------------------------------------------------------------------------------------------------------------------------------------------------------------------------------------------------------------------------------------------------------------------------------------------------------------------------------------------------------------------------------------------------------------------------------------------------------------------------------------------------------------------------------------------------------------------------------------------------------------------------------------------------------------------------------------------------------------------------------------------------------------------------------------------------------------------------------------------------------------------------------------------------------------------------------------------------------------------------------------------------------------------------------------------------------------------------------------------------------------------------------|
|                  | Guatemala, Honduras, India, Pakistan, Peru, Scotland, Senegal, Tanzania, Zambia) |                        |                     |                                 | antenatal care (ANC) and birth planning, postnatal/newborn care, breastfeeding, and birth spacing/family planning. |                                                           | <p>A study in India reported significantly greater increases in 3 ANC visits in the intervention community compared to the control (3.6% to 12.2% versus 6.9% to 9.0%, <math>p &lt; 0.001</math>).</p> <p>A multi-country study (Argentina, DRC, Guatemala, India, Pakistan, and Zambia) reported a significant increase in primigravida women who booked ANC visits early in pregnancy (18.75% to 56.9%, <math>p &lt; 0.001</math>) but a nonsignificant increase in those who had at least 4+ ANC visits during pregnancy.</p> <p>A study in Cambodia reported an increase of 22% in ANC utilization (1015 women to 1241 women).</p> <p>A study in Honduras reported that ANC visits increased from 180/month to 258/month and that women attending 4+ ANC visits increased (from 62% to 87%). A study in Nepal reported that women in the intervention communities were more likely to have had any ANC visit (aOR = 2.82, 95% CI: 1.41, 5.62).</p> <p>A study in Bangladesh reported a significant increase in at least 1 ANC visit (48% to 72%).</p> <p>Studies in Bangladesh, Bolivia and India reported increases in ANC utilization but it was not statistically significant</p> <ul style="list-style-type: none"> <li>- India: any ANC visits (aOR = 1.60, 95% CI: 0.65, 3.92) or in 3 ANC visits (aOR = 0.69, 95% CI: 0.37, 1.26);</li> <li>- Bangladesh: any ANC (aRR = 0.91, 95% CI: 0.76, 1.09) or 4 ANC visits (aRR = 0.79, 95% CI: 0.46, 1.37)</li> </ul> |
| Lassi et al 2019 | LMICs (Argentina, Bangladesh, China, Egypt, Ethiopia,                            | 33                     | ANC                 | 18                              | To compare a community health educational strategy versus no strategy or the existing approach                     | educational interventions - one-to-one & group counseling | Random-effects model analysis studies found community health education interventions increased ANC utilization by 16% (RR 1.16, 95% CI 1.11 to 1.22; 18 studies; $n = 307,528$ ; $I^2 = 96\%$ ; $\text{Chi}^2 P < 0.00001$ ).                                                                                                                                                                                                                                                                                                                                                                                                                                                                                                                                                                                                                                                                                                                                                                                                                                                                                                                                                                                                                                                                                                                                                                                                                                             |

| Author                      | Geographic Setting                                                                                                                                                                                           | # of Studies in Review | Outcome of Interest | # of Studies with CM + ANC/ PNC | Stated Objective/ Question                                                                                                                                                                                                                                                                                                                     | CM Activities [as reported in review] | Key Findings/Major Themes                                                                                                                                                                 |
|-----------------------------|--------------------------------------------------------------------------------------------------------------------------------------------------------------------------------------------------------------|------------------------|---------------------|---------------------------------|------------------------------------------------------------------------------------------------------------------------------------------------------------------------------------------------------------------------------------------------------------------------------------------------------------------------------------------------|---------------------------------------|-------------------------------------------------------------------------------------------------------------------------------------------------------------------------------------------|
|                             | Guatemala, India, Kenya, Malawi, Nepal, Pakistan, South Africa, Syria, Tanzania, Uganda, Vietnam, Zambia)                                                                                                    |                        |                     |                                 | to health education on maternal and newborn care in LMICs, as imparted to mothers or their family members specifically in community settings during the antenatal and/or postnatal period, in terms of effectiveness for improving neonatal health and survival (i.e. neonatal mortality, neonatal morbidity, access to health care, and cost) |                                       | Additionally, receiving both one-to-one and group counselling saw an increase of ANC utilization by 21% (RR 1.21, 95% CI 1.07 to 1.37; 5 studies; n = 51,352; I2 = 97%; Chi2 P < 0.00001) |
| Mangham-Jeffries et al 2014 | LMICs (Bangladesh, Benin, Guinea, Burkina Faso, Cambodia, DRC, The Gambia, Honduras, India, Indonesia, Kenya, Malawi, Mozambique, Nepal, Niger, Nigeria, Papua New Guinea, Senegal, Uganda, Ukraine, Zambia) | 48                     | ANC                 | 2                               | To identify studies that report on the cost-effectiveness of strategies to improve the utilization and/or provision of maternal and newborn health care in low-income and lower-middle-income countries.                                                                                                                                       | women's groups, home visits           | One study in Cambodia reported a 22% increase in ANC.<br><br>An additional study in Bangladesh reported numbers of new ANC users.                                                         |

| Author              | Geographic Setting                                                                                                                                                                                                            | # of Studies in Review | Outcome of Interest | # of Studies with CM + ANC/ PNC | Stated Objective/ Question                                                                                                                       | CM Activities [as reported in review]                                                                                         | Key Findings/Major Themes                                                                                                                                                                                                                                                                                                                                                                                                                                                                                                                                                                                                                                                                                                                                                                                                                                                                                                                                                                                                                                                |
|---------------------|-------------------------------------------------------------------------------------------------------------------------------------------------------------------------------------------------------------------------------|------------------------|---------------------|---------------------------------|--------------------------------------------------------------------------------------------------------------------------------------------------|-------------------------------------------------------------------------------------------------------------------------------|--------------------------------------------------------------------------------------------------------------------------------------------------------------------------------------------------------------------------------------------------------------------------------------------------------------------------------------------------------------------------------------------------------------------------------------------------------------------------------------------------------------------------------------------------------------------------------------------------------------------------------------------------------------------------------------------------------------------------------------------------------------------------------------------------------------------------------------------------------------------------------------------------------------------------------------------------------------------------------------------------------------------------------------------------------------------------|
| Marston et al 2013  | LMICs (Bangladesh, Kenya, Malawi, Nepal, India)                                                                                                                                                                               | 15                     | ANC                 | 7                               | Examining the effectiveness of community participation interventions in maternal and newborn health, asking: did participation improve outcomes? | Women's groups (Nepal, Bangladesh, India, Malawi); evidence-based dialogue model (Kenya); participatory methodologies (Nepal) | <p>A women's group intervention in Nepal was reported to have a positive effect on ANC uptake (AOR=2.82, 95% confidence interval 1.41–5.62).</p> <p>An additional study on youth in Nepal reported overall use of antenatal facilities actually decreased even though the participatory approach empowered the target population and increased the community's demand for information.</p> <p>Two studies in India as well as a study on participatory dialogue in Kenya did not report a statistically significant increase in ANC.</p> <p>A study in Malawi reported marginally higher odds of ANC in a health facility (AOR=1.44, 95%CI 1.00-2.13).</p>                                                                                                                                                                                                                                                                                                                                                                                                               |
| Mbuagbaw et al 2015 | Global (Argentina, Bangladesh, Brazil, Cuba, Eastern China, Ghana, Honduras, India, Laos, Malawi, Mexico, Mongolia, Nepal, Pakistan, Rwanda, Saudi Arabia, South Africa, Southern Tanzania, Thailand, Uganda, United Kingdom, | 34                     | 16 (1 early ANC)    | 23                              | To assess the effects of health system and community interventions for improving coverage of antenatal care and other perinatal health outcomes. | Mass media campaigns. Social mobilisation. Information-education-communication (IEC).                                         | <p>This synthesis considered outcomes when populations received one or multiple community interventions.</p> <p>In populations that received one intervention versus none, ANC coverage of 4+ visits showed "marginal results favoring the interventions and substantial heterogeneity (average odds ratio (OR) 1.11, 95% confidence interval (CI) 1.01 to 1.22; studies = 10; 45,022 women" when using an intra-cluster correlation coefficient of 0.02. Pooled results for ANC coverage of 1+ visits demonstrated a marginal improvement but also high levels of heterogeneity (average OR 1.68, 95% CI 1.02 to 2.79; studies = 6).</p> <p>In populations that received a combination of interventions versus none, there was no clear difference in ANC coverage of 4+ visits, however for ANC coverage of 1+ visit, women in the intervention arms had higher odds of attending at least one ANC session (average OR 1.79, 95% CI 1.47 to 2.17; studies = 5). One study reported that a combined intervention did not encourage more women to attend ANC earlier</p> |



| Author                                 | Geographic Setting                       | # of Studies in Review | Outcome of Interest | # of Studies with CM + ANC/ PNC | Stated Objective/ Question                                                                                                                                                                                                                                       | CM Activities [as reported in review]                                                                                                                                                  | Key Findings/Major Themes                                                                                                                                                                                                                                                                                                                                                                                                                                                                    |
|----------------------------------------|------------------------------------------|------------------------|---------------------|---------------------------------|------------------------------------------------------------------------------------------------------------------------------------------------------------------------------------------------------------------------------------------------------------------|----------------------------------------------------------------------------------------------------------------------------------------------------------------------------------------|----------------------------------------------------------------------------------------------------------------------------------------------------------------------------------------------------------------------------------------------------------------------------------------------------------------------------------------------------------------------------------------------------------------------------------------------------------------------------------------------|
|                                        | USA, Vietnam, Zanzibar, Zimbabwe)        |                        |                     |                                 |                                                                                                                                                                                                                                                                  |                                                                                                                                                                                        | in pregnancy (OR 0.83, 95% CI 0.47 to 1.47; studies = 1).                                                                                                                                                                                                                                                                                                                                                                                                                                    |
| Perry et al 2017 & Jennings et al 2017 | LMICs                                    | 700                    | ANC                 | maternal health - 152; ANC - 37 | Community-based primary health care to improve MNCH in LMICs: (1) What kinds of projects were implemented? (2) What were the outcomes of these projects? (3) What kinds of implementation strategies were used? (4) What are the implications of these findings? | four common implementation interventions: home visits, community case management, participatory women's groups, mobile teams at health facilities (about health system/access, not CM) | 34 studies reported increases in ANC, three studies reported no change (or no statistically significant change) in ANC, no studies reported a decrease in ANC [chapter 2]                                                                                                                                                                                                                                                                                                                    |
| Prost et al 2013                       | LMICs (Bangladesh, India, Malawi, Nepal) | 7                      | ANC - 6; PNC - 5    | 6                               | To assess the effect of women's groups practising participatory learning and action, compared with usual care, on maternal mortality, neonatal mortality, and stillbirths in low-resource settings                                                               | women's groups                                                                                                                                                                         | Two studies reported on how women's groups significantly increased ANC uptake.<br><br>Four additional studies did not find significant differences in ANC uptake.<br><br>One study reported an increase in postpartum checks.<br><br>Two studies reported a statistically insignificant increase in care-seeking in case of a postpartum problem for the mother, while four reported a statistically insignificant increase in care-seeking in case of a postpartum problem for the newborn. |

| Author            | Geographic Setting                              | # of Studies in Review | Outcome of Interest | # of Studies with CM + ANC/ PNC | Stated Objective/ Question                                                                                                                                                                                                                                                                                                                                                                                                               | CM Activities [as reported in review]                                                                                                                                          | Key Findings/Major Themes                                                                                                                                                                                                                                                                                                                                                                                                                                                                                       |
|-------------------|-------------------------------------------------|------------------------|---------------------|---------------------------------|------------------------------------------------------------------------------------------------------------------------------------------------------------------------------------------------------------------------------------------------------------------------------------------------------------------------------------------------------------------------------------------------------------------------------------------|--------------------------------------------------------------------------------------------------------------------------------------------------------------------------------|-----------------------------------------------------------------------------------------------------------------------------------------------------------------------------------------------------------------------------------------------------------------------------------------------------------------------------------------------------------------------------------------------------------------------------------------------------------------------------------------------------------------|
|                   |                                                 |                        |                     |                                 |                                                                                                                                                                                                                                                                                                                                                                                                                                          |                                                                                                                                                                                | One study reported a statistically significant increase in care-seeking practices in case of a newborn's health problem.                                                                                                                                                                                                                                                                                                                                                                                        |
| Sarkar et al 2015 | LMICs (India, Malawi, Nepal)                    | 8                      | ANC & PNC           | 5                               | To identify and analyze effective community based interventions for improving the reproductive health outcomes of young married women (aged 15–24 years) that can be delivered in a resource-constrained setting.                                                                                                                                                                                                                        | individual and group counseling, community education campaigns, group training, advocacy workshops, street plays and drama, youth groups, events                               | Three of the initiatives demonstrated improvements in ANC - ANC check-ups by first time mothers increased in FTP (in Diamond Harbor, Baseline: 33%, End line: 53%), ACQUIRE (Baseline: 29%, End line: 50%) and REWARD (Mothers Groups: Baseline: 20%, End line: 54%).<br><br>These three initiatives also reported on improving PNC, but only two of them (FTP and ACQUIRE) showed a significant improvement in first-time mothers receiving PNC check-ups within 6 weeks of postpartum (effect ranged 10-39%). |
| Sharma et al 2018 | South Asia (Bangladesh, India, Nepal, Pakistan) | 11                     | ANC                 | 8                               | To compare the effectiveness of interventions to promote family and community participation in maternal health care against standard health care and health service led programs on the outcomes: indicators of maternal health care knowledge improvement, maternal health care utilisation (antenatal care, facility birth, skilled birth attendant use), and maternal mortality in rural-remote regions of the South Asian countries, | community mobilisers deliver MH education: home care and community care; HCWs community education; women's MH education group; women and men's MH health care education groups | Community interventions increased attendance of 1+ ANC visit by an average of 19% (RR 1.19, 95% CI 1.06 to 1.33; participants = 75,737; studies = 8; I2 = 58%) compared with control.                                                                                                                                                                                                                                                                                                                           |

| Author             | Geographic Setting | # of Studies in Review | Outcome of Interest | # of Studies with CM + ANC/ PNC | Stated Objective/ Question                                                                                                                                                          | CM Activities [as reported in review]                                                                                                                                                                                                                                                                                                                                                                                                                                                                                                                    | Key Findings/Major Themes                                                                                                                                                                                                      |
|--------------------|--------------------|------------------------|---------------------|---------------------------------|-------------------------------------------------------------------------------------------------------------------------------------------------------------------------------------|----------------------------------------------------------------------------------------------------------------------------------------------------------------------------------------------------------------------------------------------------------------------------------------------------------------------------------------------------------------------------------------------------------------------------------------------------------------------------------------------------------------------------------------------------------|--------------------------------------------------------------------------------------------------------------------------------------------------------------------------------------------------------------------------------|
|                    |                    |                        |                     |                                 | Bangladesh, India, Nepal, and Pakistan.                                                                                                                                             |                                                                                                                                                                                                                                                                                                                                                                                                                                                                                                                                                          |                                                                                                                                                                                                                                |
| Wekesah et al 2016 | Sub-Saharan Africa | 73                     | ANC - 6;<br>PNC - 1 | 8                               | A systematic review of published evidence on non-drug interventions that reported effectiveness in improving outcomes and quality of care in maternal health in sub-Saharan Africa. | <ol style="list-style-type: none"> <li>1. Community mobilization through women's groups;</li> <li>2. Skilled birth attendants;</li> <li>3. Training health extension workers;</li> <li>4. Training and deployment of community health development agents;</li> <li>5. Traditional birth attendants (TBAs);</li> <li>6. Family and community members meetings on health care;</li> <li>7. Trained volunteers to provide health care at the community;</li> <li>8. Village health teams;</li> <li>9. Peer mentors who women are living with HIV</li> </ol> | <p>One study in Kenya reported a significant increase in ANC from 39% to 62%.</p> <p>A study in Tanzania found women in the intervention arm were 22.7% (versus 2.2%) more likely to attend PNC within the first 48 hours.</p> |

| Author                  | Geographic Setting                                                                                                                                                                     | # of Studies in Review | Outcome of Interest | # of Studies with CM + ANC/ PNC | Stated Objective/ Question                                                                                                                                                                                               | CM Activities [as reported in review]                         | Key Findings/Major Themes                                                                                                                                                                                                            |
|-------------------------|----------------------------------------------------------------------------------------------------------------------------------------------------------------------------------------|------------------------|---------------------|---------------------------------|--------------------------------------------------------------------------------------------------------------------------------------------------------------------------------------------------------------------------|---------------------------------------------------------------|--------------------------------------------------------------------------------------------------------------------------------------------------------------------------------------------------------------------------------------|
| Beck et al 2019         | Sub-Saharan Africa (Cameroon, Guinea Bissau, Kenya, Liberia, Madagascar, Malawi, Nigeria, Uganda)                                                                                      | 19                     | ANC                 | 2                               | To gain an understanding of how CM interventions for maternal and child health in sub-Saharan Africa impact the empowerment of individuals                                                                               | None listed                                                   | Two studies demonstrated CM increased care-seeking behaviours, two studies demonstrated increased number of ANC visits.                                                                                                              |
| Deshmukh et al 2020     | LMICs (Afghanistan, Bangladesh, Cameroon, China, Ethiopia, Ghana, India, Indonesia, Jordan, Malawi, Morocco, Nepal, Pakistan, Palestine, Philippines, Sudan, Tanzania, Uganda, Zambia) | 47                     | PNC                 | <i>unknown</i>                  | To profile the determinants of PNC service provision and utilization patterns in a comprehensive manner as available in the published literature in low resource settings.                                               | social mobilization as an opportunity for education/awareness | The reviewers identified social mobilization as an opportunity to increase awareness of PNC services and health complications in the nexus framework they applied to the included studies.                                           |
| George & Branchini 2017 | LMICs (Angola, Argentina, Bangladesh, Bolivia, Cambodia, Canada, China, DRC, Ethiopia, Ghana, Guatemala, Honduras,                                                                     | 26                     | ANC                 | 4                               | Examine the diverse range of initiatives that promote awareness of rights to quality maternity care services to derive the common principles and processes related to stakeholder experiences and implementation factors | public meetings, committees, information dissemination        | Three studies demonstrated an increase in ANC uptake with CM initiatives present (two in India, one in Uganda).<br><br>An additional study in India demonstrated an increase in ANC uptake but it was not statistically significant. |

| Author              | Geographic Setting                                                                                                              | # of Studies in Review | Outcome of Interest | # of Studies with CM + ANC/ PNC | Stated Objective/ Question                                                                                                                                       | CM Activities [as reported in review]                                                                 | Key Findings/Major Themes                                                                                                     |
|---------------------|---------------------------------------------------------------------------------------------------------------------------------|------------------------|---------------------|---------------------------------|------------------------------------------------------------------------------------------------------------------------------------------------------------------|-------------------------------------------------------------------------------------------------------|-------------------------------------------------------------------------------------------------------------------------------|
|                     | India, Kazakhstan, Kenya, Mexico, Mozambique, Nepal, Nigeria, Pakistan, Peru, Romania, South Africa, Tanzania, Uganda, Uruguay) |                        |                     |                                 | to guide future efforts in this area.                                                                                                                            |                                                                                                       |                                                                                                                               |
| Gogia et al 2011    | LMICs (Bangladesh, The Gambia, Greece, India, Nepal, Pakistan)                                                                  | 13                     | ANC                 | 5                               | To assess the effect of community based neonatal care by community health workers (CHWs) on neonatal mortality rates in resource-limited settings.               | group meetings, community health committees, education sessions, participatory action learning cycles | One study demonstrated improvement in at least 1 ANC visit.                                                                   |
| Muzyamba et al 2017 | Sub-Saharan Africa (Angola, Ethiopia, Kenya, Malawi, Nigeria, Sahel, South Africa, Sudan, Tanzania, Zambia)                     | 14                     | ANC                 | 3                               | To provide an overview of the empirical evidence on the role of community mobilization in maternal care provision to women living with HIV in sub-Saharan Africa | Group/peer support for pregnant women/new mothers                                                     | Three studies reported that peer support for women with HIV increased access to health resources, including ANC.              |
| Parsekar et al 2020 | South Asia (Bangladesh, India, Nepal)                                                                                           | <i>Not stated</i>      | ANC                 | 1                               | To collate the evidence on the current status of “Reproductive, Maternal, Newborn, Child and Adolescent Health” (RMNCAH) and related Behaviour                   | information, education, communication/behaviour change communication initiative                       | <i>This narrative review described the strategies used by one IEC initiative in Nepal but did not report on the outcomes.</i> |

| Author               | Geographic Setting                                                            | # of Studies in Review | Outcome of Interest | # of Studies with CM + ANC/ PNC | Stated Objective/ Question                                                                                                                                                                                                                                                                                                                                     | CM Activities [as reported in review]                                                     | Key Findings/Major Themes                                                                                                                  |
|----------------------|-------------------------------------------------------------------------------|------------------------|---------------------|---------------------------------|----------------------------------------------------------------------------------------------------------------------------------------------------------------------------------------------------------------------------------------------------------------------------------------------------------------------------------------------------------------|-------------------------------------------------------------------------------------------|--------------------------------------------------------------------------------------------------------------------------------------------|
|                      |                                                                               |                        |                     |                                 | Change Communication (BCC) interventions in RMNCAH in South Asia                                                                                                                                                                                                                                                                                               |                                                                                           |                                                                                                                                            |
| Schiffman et al 2010 | LMICs (Argentina, Bangladesh, DRC, Guatemala, India, Nepal, Pakistan, Zambia) | 9                      | ANC                 | 4                               | (1) to systematically identify largescale, controlled studies that test a CBIP with a primary focus on Family-Community Care interventions because they have a greater potential impact than Outreach and Clinical Care interventions, (2) to describe the positive and negative findings of the studies identified, and (3) to summarize the lessons learned. | community health committees, group meetings, participatory learning activities, folksongs | <i>This review focused on presenting mortality-related outcomes and did not report on the outcomes related to changes in care seeking.</i> |
| Singh et al 2021     | India                                                                         | 66                     | ANC                 | 1                               | To synthesize the impacts of public health programs on uptake of maternal and child health services as well as the short-term/ intermediate and long-term outcomes.                                                                                                                                                                                            | ASHA health awareness                                                                     | <i>This review presented one study with ASHAs which demonstrated an increase in ANC.</i>                                                   |
| Takah et al 2019     | Sub-Saharan Africa (Kenya, Malawi, Mozambique, Tanzania, Uganda, Zambia,)     | 8                      | ANC                 | 1                               | 1. To determine the interventions/approaches used to improve male partner involvement within the context of PMTCT, specifically hospital delivery services by                                                                                                                                                                                                  | community meetings (talks, music, dance, dramas)                                          | <i>This review did not present outcomes related to ANC/PNC care seeking.</i>                                                               |

| Author          | Geographic Setting                                                                                                                                | # of Studies in Review | Outcome of Interest | # of Studies with CM + ANC/ PNC | Stated Objective/ Question                                                                                                                                                                                         | CM Activities [as reported in review] | Key Findings/Major Themes                                                                        |
|-----------------|---------------------------------------------------------------------------------------------------------------------------------------------------|------------------------|---------------------|---------------------------------|--------------------------------------------------------------------------------------------------------------------------------------------------------------------------------------------------------------------|---------------------------------------|--------------------------------------------------------------------------------------------------|
|                 |                                                                                                                                                   |                        |                     |                                 | pregnant women living with HIV in sub-Saharan Africa.<br>2. To determine the impact of these approaches on the utilization of hospital delivery services by pregnant women living with HIV in sub-Saharan Africa.  |                                       |                                                                                                  |
| Yuan et al 2014 | LMICs (Bangladesh, Brazil, China, Colombia, Guinea-Bissau, India, Indonesia, Nepal, Nigeria, Philippines, South Africa, Tanzania, Uganda, Zambia) | 22                     | ANC                 | 2                               | To collect evidence about the differential effects of interventions on different sociodemographic groups in order to identify interventions that were effective in reducing maternal or child health inequalities. | participatory women's group           | One intervention in Bangladesh demonstrated a reduction in income inequalities in access to ANC. |

## Appendix 5: Additional evidence reported in reviews to support Downe et al. qualitative evidence synthesis

| DOWNE ET AL. FINDINGS                                             | ADDITIONAL INSIGHT                                                                                                                                                                                                                                                                                                                                                                                                                                                                                                                                                                                                                                                                                                                                                                                                                                                                      | REFERENCE                    |
|-------------------------------------------------------------------|-----------------------------------------------------------------------------------------------------------------------------------------------------------------------------------------------------------------------------------------------------------------------------------------------------------------------------------------------------------------------------------------------------------------------------------------------------------------------------------------------------------------------------------------------------------------------------------------------------------------------------------------------------------------------------------------------------------------------------------------------------------------------------------------------------------------------------------------------------------------------------------------|------------------------------|
| <b><i>SOCIO-CULTURAL CONTEXT</i></b>                              |                                                                                                                                                                                                                                                                                                                                                                                                                                                                                                                                                                                                                                                                                                                                                                                                                                                                                         |                              |
| <b><i>W1. INFLUENCE OF TRADITIONAL BELIEFS</i></b>                | Sixteen studies described how community contexts, cultural beliefs, traditions, and norms influence women's abilities to seek care during postnatal period.                                                                                                                                                                                                                                                                                                                                                                                                                                                                                                                                                                                                                                                                                                                             | Deshmukh et al               |
|                                                                   | One included study used stakeholder problem-solving meetings to determine action/priorities.                                                                                                                                                                                                                                                                                                                                                                                                                                                                                                                                                                                                                                                                                                                                                                                            | Mbuagbaw et al               |
|                                                                   | Review operationalized community mobilization in the included studies along three principles: "[1] collaboration between community and professionals in designing maternal care initiatives, [2] use of indigenous resources in maternal care provision (e.g. TBA), [3] reliance on peer support for pregnant women and new mothers."                                                                                                                                                                                                                                                                                                                                                                                                                                                                                                                                                   | Muzyamba et al               |
| <b><i>W2. INFLUENCE OF OTHERS</i></b>                             | Studies described how community biases and expectations could be a barrier that was overcome through separate stakeholder meetings, discussions around male participation or resistance, identification of local champions. These community conflicts could also be influenced by inherent divisions in the community for example, along political party lines. The influence of others, such as family or friends, was an important component of implementation. Peers through women support groups for example provided "space for social bonding, changing social norms and building self-esteem."                                                                                                                                                                                                                                                                                   | George & Branchini           |
|                                                                   | Studies described community mobilization "is reliant on components related to the incorporation of existing structures, partnership building, and local context." These strategies used existing community groups and leaders, health workers, and traditional birth attendants. It was also imperative to build partnerships at local, regional, and/or national levels (with government and nongovernment officials as well as local leaders and chiefs) in order to promote sustainable community mobilisation initiatives.                                                                                                                                                                                                                                                                                                                                                          | Beck et al                   |
|                                                                   | The review described an initiative where information that was shared with women's groups was then also taken to the health system level through local elected representatives in order to collaborate on local action plans to resolve issues.                                                                                                                                                                                                                                                                                                                                                                                                                                                                                                                                                                                                                                          | George et al                 |
| <b><i>P1. CO-OPERATION WITH INFLUENTIAL COMMUNITY MEMBERS</i></b> | Studies described how community biases and expectations could be a barrier that was overcome through separate stakeholder meetings, discussions around male participation or resistance, identification of local champions. These community conflicts could also be influenced by inherent divisions in the community for example, along political party lines. Studies emphasized gaining buy-in and the involvement of community leaders prior to initiating any community initiatives, including government and health systems representatives. The successful projects involved community organizers who were trusted by the local community and included strategic alliances across civil society and government representatives. Two studies highlighted the importance of gender balance in organizers and peer educators in order to reach both men and women in the community. | George & Branchini           |
|                                                                   | Local leaders were used to promote ANC attendance through community mobilization strategies.                                                                                                                                                                                                                                                                                                                                                                                                                                                                                                                                                                                                                                                                                                                                                                                            | Mangham-Jeffries et al       |
|                                                                   | Review operationalized community mobilization in the included studies along three principles: "[1] collaboration between community and professionals in designing maternal care initiatives, [2] use of indigenous resources in maternal care provision (e.g. TBA), [3] reliance on peer support for pregnant women and new mothers."                                                                                                                                                                                                                                                                                                                                                                                                                                                                                                                                                   | Muzyamba et al               |
|                                                                   | Potential strategies included engaging community leaders to mobilize the community and the formation of village of health committees.                                                                                                                                                                                                                                                                                                                                                                                                                                                                                                                                                                                                                                                                                                                                                   | Perry et al & Jennings et al |
| <b><i>P2. TRADITIONAL, SOCIETAL AND</i></b>                       | One study described involving local male champions to influence acceptability and higher uptake of hospital delivery.                                                                                                                                                                                                                                                                                                                                                                                                                                                                                                                                                                                                                                                                                                                                                                   | Takah et al                  |
|                                                                   | Involvement of "technical leaders and policy makers" to develop standards that would be nationally acceptable.                                                                                                                                                                                                                                                                                                                                                                                                                                                                                                                                                                                                                                                                                                                                                                          | Wekesah et al                |
|                                                                   | Community mobilization strategies were influenced by local context such as "socio-cultural preferences or beliefs, political influence, and/or environmental, geographical, or historical factors."                                                                                                                                                                                                                                                                                                                                                                                                                                                                                                                                                                                                                                                                                     | Beck et al                   |



|                                                            |                                                                                                                                                                                                                                                                                                                                                                                                                                                                                                                                                                                                                                                                                                                                                                                                                                                                                         |                                    |
|------------------------------------------------------------|-----------------------------------------------------------------------------------------------------------------------------------------------------------------------------------------------------------------------------------------------------------------------------------------------------------------------------------------------------------------------------------------------------------------------------------------------------------------------------------------------------------------------------------------------------------------------------------------------------------------------------------------------------------------------------------------------------------------------------------------------------------------------------------------------------------------------------------------------------------------------------------------|------------------------------------|
| <b>COMMUNITY NORMS, PRACTICES AND BELIEFS</b>              | Studies described how community biases and expectations could be a barrier that was overcome through separate stakeholder meetings, discussions around male participation or resistance, identification of local champions. These community conflicts could also be influenced by inherent divisions in the community for example, along political party lines. Studies emphasized gaining buy-in and the involvement of community leaders prior to initiating any community initiatives, including government and health systems representatives. The successful projects involved community organizers who were trusted by the local community and included strategic alliances across civil society and government representatives. Two studies highlighted the importance of gender balance in organizers and peer educators in order to reach both men and women in the community. | George & Branchini                 |
| <b>W6. GENDER ISSUES - FINANCIAL DEPENDENCE ON HUSBAND</b> | One study highlighted the importance of considering cultural norms in delivering financial incentives to women.<br>The involvement of men/male partners in ANC was stressed by Tanzania's Ministry of Health and Social Welfare in order to improve women's access to care and therefore improve maternal, newborn, and child health. One study highlighted the importance of considering cultural norms in delivering financial incentives to women.                                                                                                                                                                                                                                                                                                                                                                                                                                   | Kearns et al<br>Kearns et al       |
| <b>W8. GENDER ISSUES - GENDER OF HEALTH CARE PROVIDER</b>  | Community engagement activities can empower women through education and awareness, women's groups, and financial programs such as women's microcredit and savings groups.                                                                                                                                                                                                                                                                                                                                                                                                                                                                                                                                                                                                                                                                                                               | Perry et al & Jennings et al       |
| <b>W9. GENDER ISSUES - WOMEN'S FREEDOM OF MOVEMENT</b>     | Two studies highlighted the importance of gender balance in organizers and peer educators in order to reach both men and women in the community.<br>Studies used Lady Health Workers to provide basic care to women as well as health education in the community.                                                                                                                                                                                                                                                                                                                                                                                                                                                                                                                                                                                                                       | George & Branchini<br>Kearns et al |
|                                                            | Gender norms could affect women's education as well as mobility, which influenced their participation in interventions and care-seeking behaviour.                                                                                                                                                                                                                                                                                                                                                                                                                                                                                                                                                                                                                                                                                                                                      | Sarkar et al                       |

### **SERVICE PHILOSOPHY, DESIGN, AND PROVISION**

|                                          |                                                                                                                                                                                                                                                                                                                                                                                                                                                                                                                                                                                                                                               |                                                                                                              |
|------------------------------------------|-----------------------------------------------------------------------------------------------------------------------------------------------------------------------------------------------------------------------------------------------------------------------------------------------------------------------------------------------------------------------------------------------------------------------------------------------------------------------------------------------------------------------------------------------------------------------------------------------------------------------------------------------|--------------------------------------------------------------------------------------------------------------|
| <b>W10. POOR INFRASTRUCTURE</b>          | Studies reported how programming, human resource skills, supply chain management, and lack of transportation contributed to poor quality ANC and PNC.                                                                                                                                                                                                                                                                                                                                                                                                                                                                                         | Kearns et al                                                                                                 |
| <b>W11 &amp; P3. PROXIMITY OF CLINIC</b> | 26 studies described accessibility as household-level barriers.<br>Studies described how distance from a facility could prevent timely care in remote areas and that making services and referral hospitals accessible improved health and wellbeing.                                                                                                                                                                                                                                                                                                                                                                                         | Deshmukh et al<br>Kearns et al                                                                               |
| <b>P4. AVAILABILITY OF TRANSPORT</b>     | One study reported how making transportation available increased the accessibility of care.<br>Studies reported how programming, human resource skills, supply chain management, and lack of transportation contributed to poor quality ANC and PNC.<br>Collaborative design was used to create initiatives to improve access to care - including transportation during obstetric emergencies.                                                                                                                                                                                                                                                | George et al<br>Kearns et al<br>Muzyamba et al                                                               |
| <b>W12. INDIRECT COST OF SERVICES</b>    | One study provided free delivery care as well as coverage for transportation costs.<br>14 studies described financial issues as household-level barriers.<br>Three studies examined reducing the costs of maternal care through removing user fees, introducing fixed charges, or using vouchers to cover care and transport costs.<br>This review described the "Reproductive Health Vouchers Programme" or DSF programme launched by the MOHFW with WHO support. This program provided ANC, PNC, and emergency care as well as cash incentives.<br>This review listed microcredit programs for women as a way to combat financial barriers. | Parsekar et al<br>Deshmukh et al<br>Mangham-Jeffries et al<br>Parsekar et al<br>Perry et al & Jennings et al |
| <b>W17. FLEXIBILITY OF APPOINTMENTS</b>  | 12 studies reported demand-side financial incentives such as user fee exemptions, cost-sharing programs, and vouchers for care, facility-based deliveries and other indirect costs such as transportation.<br>Payment schemes and initiatives led to increased numbers of institutional deliveries as well as improvements in ANC services.<br>One study in Andhra Pradesh reported that auxiliary nurse midwives were more available for appointments and responsive.                                                                                                                                                                        | Wekesah et al<br>Wekesah et al<br>George et al                                                               |

|                                                                           |                                                                                                                                                                                                                                                                                                                                                                                 |                        |
|---------------------------------------------------------------------------|---------------------------------------------------------------------------------------------------------------------------------------------------------------------------------------------------------------------------------------------------------------------------------------------------------------------------------------------------------------------------------|------------------------|
| <b>P12. SHORTAGE OF STAFF</b>                                             | The review reported multiple studies where healthcare workers cited difficult work environments, staff shortages, limited supplies and resources, and large patient loads.                                                                                                                                                                                                      | George & Branchini     |
|                                                                           | Health systems challenges such as staff shortages and limited supplies and resources were barriers to appropriate ANC delivery. Studies reported how programming, human resource skills, supply chain management, and lack of transportation contributed to poor quality ANC and PNC.                                                                                           | Kearns et al           |
| <b>P13. AVAILABILITY OF RESOURCES</b>                                     | Three studies described how providers believed available resources and incentives enabled provision of PNC.                                                                                                                                                                                                                                                                     | Deshmukh et al         |
|                                                                           | The review reported multiple studies where healthcare workers cited difficult work environments, staff shortages, limited supplies and resources, and large patient loads.                                                                                                                                                                                                      | George & Branchini     |
|                                                                           | Health systems challenges such as staff shortages and limited supplies and resources were barriers to appropriate ANC delivery.                                                                                                                                                                                                                                                 | Kearns et al           |
| <b>P14. STAFF WORKING CONDITIONS</b>                                      | One study described strengthening the capacity of the health system to manage referrals through improved equipment and training.                                                                                                                                                                                                                                                | Schiffman et al        |
|                                                                           | The review reported multiple studies where healthcare workers cited difficult work environments, staff shortages, limited supplies and resources, and large patient loads.                                                                                                                                                                                                      | George & Branchini     |
| <b>P15. STAFF TRAINING</b>                                                | Healthcare provider's knowledge and skills as well as availability of supplies in the health system adversely affected PNC utilization.                                                                                                                                                                                                                                         | Deshmukh et al         |
|                                                                           | Studies reported using ongoing refresher trainings for healthcare providers as well as promoting team approaches to care and strengthening interpersonal skills.                                                                                                                                                                                                                | George & Branchini     |
|                                                                           | One of the case studies presented emphasized programmes that strengthened increased provider training and referral networks and resulted in increases in PNC and postpartum contraception uptake.                                                                                                                                                                               | Kearns et al           |
| <b>P16. NEED FOR MANAGEMENT SUPPORT</b>                                   | Studies reported healthcare worker trainings improved knowledge, confidence, and overall availability and quality of emergency obstetric care. Specifically, in Burkina Faso, increased trainings, referral systems, and available resources and supplies increased facility-based deliveries as well as first ANC visits.                                                      | Wekesah et al          |
|                                                                           | Studies reported how programming, human resource skills, supply chain management, and lack of transportation contributed to poor quality ANC and PNC.                                                                                                                                                                                                                           | Kearns et al           |
| <b>WHAT MATTERS TO WOMEN &amp; STAFF (PERSONALISED SUPPORTIVE CARE)</b>   |                                                                                                                                                                                                                                                                                                                                                                                 |                        |
| <b>W19. SOCIAL &amp; COMMUNITY SUPPORT - INVOLVEMENT OF THE COMMUNITY</b> | A study described how messages were tailored based on cultural norms in the community as well as relatable metaphors.                                                                                                                                                                                                                                                           | Beck et al             |
|                                                                           | The review described an initiative where information that was share with women's groups was then also taken to the health system level through local elected representatives in order to collaborate on local action plans to resolve issues.                                                                                                                                   | George et al           |
|                                                                           | Multiple studies emphasized the importance of "understanding women's realities and what matters most to communities." This includes involving community members in the design of interventions as well as understanding the local context and consideration of stakeholders.                                                                                                    | George & Branchini     |
|                                                                           | Women's groups used participatory learning and action cycles and trained birth attendants and community health workers were drawn from the local community.                                                                                                                                                                                                                     | Gogia et al            |
|                                                                           | In one study, Lady Health Workers not only provided care but also served as a liaison between the community and the health facilities.                                                                                                                                                                                                                                          | Kearns et al           |
|                                                                           | Community mobilization interventions developed by health or research staff build off of existing groups in the communities "in order to capitalize on the strength of existing support systems and social networks." Peer-facilitated learning and community dialogues organized in the community empowered community members to participate in programming and make decisions. | Kuhlmann et al         |
|                                                                           | Educational interventions at the community level increased ANC uptake.                                                                                                                                                                                                                                                                                                          | Lassi et al            |
|                                                                           | Local community members were involved to identify priorities and implement solutions, such as supplying clean delivery kits and establishing community funds.                                                                                                                                                                                                                   | Mangham-Jeffries et al |

**W20. SOCIAL &  
COMMUNITY  
SUPPORT - PEER  
SUPPORT**

|                                                                                                                                                                                                                                                                                                                                                                                                                                                                                                                                                                                                                                                                                                                                                            |                              |
|------------------------------------------------------------------------------------------------------------------------------------------------------------------------------------------------------------------------------------------------------------------------------------------------------------------------------------------------------------------------------------------------------------------------------------------------------------------------------------------------------------------------------------------------------------------------------------------------------------------------------------------------------------------------------------------------------------------------------------------------------------|------------------------------|
| Multiple studies referred to the Warmi project women's groups which used participatory action research to have local communities/women identify and prioritise local problems and solutions.                                                                                                                                                                                                                                                                                                                                                                                                                                                                                                                                                               | Marston et al                |
| Communities were involved in problem identification and subsequent solution implementation. Examples of programs included creating community funds for care and providing transportation in case of obstetric emergencies.                                                                                                                                                                                                                                                                                                                                                                                                                                                                                                                                 | Marston et al                |
| One study used regular meetings with community stakeholders to identify problems and potential solutions.                                                                                                                                                                                                                                                                                                                                                                                                                                                                                                                                                                                                                                                  | Mbuagbaw et al               |
| Review operationalized community mobilization in the included studies along three principles: "[1] collaboration between community and professionals in designing maternal care initiatives, [2] use of indigenous resources in maternal care provision (e.g. TBA), [3] reliance on peer support for pregnant women and new mothers." This collaboration in designing initiatives improved access to treatment through initiatives such as providing transportation for pregnant women in case of obstetric emergencies.                                                                                                                                                                                                                                   | Muzyamba et al               |
| Projects could be implemented by not only community health workers but also government professionals and trained community members. Programs with the community included the formation of community or village health committees and other community groups, along with the involvement of local leaders. Communities could also be engaged in not only the planning and implementation of the program, but also the evaluation through sharing data and participatory rural appraisals. The review also reported that "81% of the projects engaged communities in project implementation, and more than half promoted partnerships between the community and the health program, promoted the use of local resources, or promoted community empowerment." | Perry et al & Jennings et al |
| Community groups in various programs implemented social mobilization activities which included special events and celebrations for the whole community as a form of health education/awareness.                                                                                                                                                                                                                                                                                                                                                                                                                                                                                                                                                            | Sarkar et al                 |
| In one study, community health committees made up of local volunteers supported Lady Health Workers by holding regular group education sessions.                                                                                                                                                                                                                                                                                                                                                                                                                                                                                                                                                                                                           | Schiffman et al              |
| One study had village volunteers or, "community resource people," identify pregnant women to encourage them to attend community meetings and seek ANC and PNC.                                                                                                                                                                                                                                                                                                                                                                                                                                                                                                                                                                                             | Schiffman et al              |
| One study that involved the community through a singing intervention to disseminate health care messaging about maternal health.                                                                                                                                                                                                                                                                                                                                                                                                                                                                                                                                                                                                                           | Sharma et al                 |
| Communicating with the community and implementing community mobilization activities (such as dramas and music as well as visiting male partners at bars, football games, and churches) encouraged trust between the community and health care workers.                                                                                                                                                                                                                                                                                                                                                                                                                                                                                                     | Takah et al                  |
| Family and friends were an important component of sustainable implementation of peer-based learning, for example. Peers through support groups or women provided "space for social bonding, changing social norms and building self-esteem."                                                                                                                                                                                                                                                                                                                                                                                                                                                                                                               | George & Branchini           |
| One study described how local women held trainings on maternal health rights within the community to build "women's leadership capacity."                                                                                                                                                                                                                                                                                                                                                                                                                                                                                                                                                                                                                  | George & Branchini           |
| Women's groups used participatory learning and action cycles and trained birth attendants and community health workers were drawn from the local community.                                                                                                                                                                                                                                                                                                                                                                                                                                                                                                                                                                                                | Gogia et al                  |
| Group care models for pregnant or postpartum women (or the entire community) fostered empowerment and provided support. These groups could provide ANC but largely were an avenue for women to come together, discuss local issues and solutions, and provide a support network during pregnancy. These groups have improved accessibility and acceptability of ANC and PNC and resulted in improved maternal and neonatal health outcomes as well as provider and patient satisfaction.                                                                                                                                                                                                                                                                   | Kearns et al                 |
| Five studies in Bangladesh, India, Malawi, and Nepal reported that women's groups improved MNH. Each program involved training local women to facilitate the monthly women's group meetings.                                                                                                                                                                                                                                                                                                                                                                                                                                                                                                                                                               | Mangham-Jeffries et al       |
| Multiple studies referred to the Warmi project women's groups which used participatory action research to have local communities/women identify and prioritise local problems and solutions.                                                                                                                                                                                                                                                                                                                                                                                                                                                                                                                                                               | Marston et al                |
| A women's group in Nepal based on the Warmi methodology had a positive effect on ANC uptake.                                                                                                                                                                                                                                                                                                                                                                                                                                                                                                                                                                                                                                                               | Marston et al                |
| Multiple studies used participatory women's groups.                                                                                                                                                                                                                                                                                                                                                                                                                                                                                                                                                                                                                                                                                                        | Mbuagbaw et al               |
| The review operationalized community mobilization in the included studies along three principles: "[1] collaboration between community and professionals in designing maternal care initiatives, [2] use of indigenous resources in maternal care provision (e.g. TBA), [3] reliance on peer support for pregnant women and new mothers." Women's groups were used as a form of peer support to provide emotional, physical, social, and psychological support. Multiple studies found this peer support contributed to increases in health-resource utilisation.                                                                                                                                                                                          | Muzyamba et al               |

|                                                                                                                                                                                                                        |                                                                                                                                                                                                                                                                                                                                                                                                                                                        |                              |
|------------------------------------------------------------------------------------------------------------------------------------------------------------------------------------------------------------------------|--------------------------------------------------------------------------------------------------------------------------------------------------------------------------------------------------------------------------------------------------------------------------------------------------------------------------------------------------------------------------------------------------------------------------------------------------------|------------------------------|
| <p><b>P18. SOCIAL &amp; COMMUNITY SUPPORT - SOCIAL SUPPORT FOR WOMEN</b></p> <p><b>W22. INDIVIDUALISED CARE - WOMEN-CENTRED CARE</b></p> <p><b>W26. AUTHENTIC AND KIND STAFF</b></p> <p><b>P20. STAFF ATTITUDE</b></p> | <p>This review reported that participatory women's groups were a common strategy to engage women and their families. These groups were led by trained facilitators and were used to provide "empowerment and education." There are multiple approaches to facilitating these women's groups including: participatory action-learning cycle, Care Groups, and education sessions.</p>                                                                   | Perry et al & Jennings et al |
|                                                                                                                                                                                                                        | <p>This review hypothesized that women's groups improve birth outcomes by building "capacities of communities to organise and mobilise to take individual, group, and community action to address the structural and intermediary determinants of health." Women's group facilitators were local women who were trained to facilitate the group meetings, rather than health care workers. These groups were associated with increased ANC uptake.</p> | Prost et al                  |
|                                                                                                                                                                                                                        | <p>Peer support strategies have become more popular to improve maternal health care uptake. One study reported volunteer peer counsellor health education in women's groups decreased maternal mortality.</p>                                                                                                                                                                                                                                          | Wekesah et al                |
|                                                                                                                                                                                                                        | <p>Women's participatory groups increased awareness and demand for maternal health services and provided an opportunity for women to discuss and identify health challenges.</p>                                                                                                                                                                                                                                                                       | Yuan et al                   |
|                                                                                                                                                                                                                        | <p>Women's groups used participatory learning and action cycles and trained birth attendants and community health workers were drawn from the local community.</p>                                                                                                                                                                                                                                                                                     | Gogia et al                  |
|                                                                                                                                                                                                                        | <p>This review hypothesized that women's groups improve birth outcomes by building "capacities of communities to organise and mobilise to take individual, group, and community action to address the structural and intermediary determinants of health."</p>                                                                                                                                                                                         | Prost et al                  |
|                                                                                                                                                                                                                        | <p>Two case studies described increased uptake and satisfaction in care by supporting care-seeking behaviours. One of these programs also credited high patient satisfaction to the emphasis on patient-centred care.</p>                                                                                                                                                                                                                              | Kearns et al                 |
|                                                                                                                                                                                                                        | <p>One study reported increases in first ANC visits as well as the "quality of women-friendly services and satisfaction of women" as a result of community-based care.</p>                                                                                                                                                                                                                                                                             | Wekesah et al                |
|                                                                                                                                                                                                                        | <p>Six studies described that positive interactions between health workers and mothers increased ANC attendance and trust.</p>                                                                                                                                                                                                                                                                                                                         | Deshmukh et al               |
|                                                                                                                                                                                                                        | <p>This review described how providers supported attitudinal changes. For example, while some challenges are "beyond their control," there was a recognized "need for a change in mindsets on their behalf."</p>                                                                                                                                                                                                                                       | George & Branchini           |
| <p><b>WHAT MATTERS TO WOMEN &amp; STAFF (INFORMATION &amp; SAFETY)</b></p>                                                                                                                                             |                                                                                                                                                                                                                                                                                                                                                                                                                                                        |                              |
| <p><b>W27. ANC AS A SOURCE OF KNOWLEDGE AND INFORMATION</b></p>                                                                                                                                                        | <p>In evaluating knowledge, awareness, and practices, it is clear that cultural beliefs and myths influence individual beliefs as well.</p>                                                                                                                                                                                                                                                                                                            | Beck et al                   |
|                                                                                                                                                                                                                        | <p>In Tanzania, education and counselling activities at ANC visits included physiological and emotional components during pregnancy as well as postpartum care. Additionally, providers are trained on how to deliver this information rather than run through a checklist of facts.</p>                                                                                                                                                               | Kearns et al                 |
|                                                                                                                                                                                                                        | <p>In the quantitative synthesis, delivering education during ANC or during both ANC and PNC periods reduce early neonatal mortality.</p>                                                                                                                                                                                                                                                                                                              | Lassi et al                  |
|                                                                                                                                                                                                                        | <p>One study described ANC coverage that included iron/folic acid supplements along with anaemia related health education.</p>                                                                                                                                                                                                                                                                                                                         | Perry et al & Jennings et al |
| <p><b>W31. ANC AS A SOURCE OF MEDICAL SAFETY</b></p>                                                                                                                                                                   | <p>This review presented studies describing other maternal health objectives such as iron and iron-folic acid conception as well as tetanus toxoid vaccination coverage.</p>                                                                                                                                                                                                                                                                           | Kuhlmann et al               |
|                                                                                                                                                                                                                        | <p>Multiple studies described antenatal care as an avenue for additional, such as through the distribution of mosquito nets or HIV/syphilis testing. Additionally, improving MNH care through community health workers and home-based care volunteers was associated with additional malaria prophylaxis as well as vitamin and supplement distribution.</p>                                                                                           | Mangham-Jeffries et al       |
|                                                                                                                                                                                                                        | <p>One study described ANC coverage that included iron/folic acid supplements along with anaemia related health education.</p>                                                                                                                                                                                                                                                                                                                         | Perry et al & Jennings et al |
